# Supplementary material
Source: PubMed Central journal article supplement (PMC7855046)

**Supplemental Table 1.** Mean A1c according to use of medical nutrition therapy strategies over time, by diabetes type

|                                 | N    | Overall<br>p-value <sup>†</sup> | Often using<br>lsmean (SE) | Started using<br>lsmean (SE) | Sometimes using<br>lsmean (SE) | Stopped using<br>lsmean (SE) | Never using<br>lsmean (SE) |
|---------------------------------|------|---------------------------------|----------------------------|------------------------------|--------------------------------|------------------------------|----------------------------|
| <b>Type 1 diabetes</b>          |      |                                 |                            |                              |                                |                              |                            |
| Keep track of calories          | 1194 | 0.03                            | 9.1 (0.3)                  | 9.0 (0.2)                    | 9.0 (0.2)                      | 9.4 (0.2)                    | 9.4 (0.2)                  |
| Count carbohydrates             | 1476 | 0.0001                          | 9.3 (0.1)                  | 9.5 (0.3)                    | 10.1 (0.2)                     | 9.9 (0.3)                    | 8.5 (0.5)                  |
| Choose low glycemic index foods | 1185 | 0.006                           | 9.1 (0.3)                  | 9.3 (0.2)                    | 9.2 (0.2)                      | 9.7 (0.2)                    | 9.6 (0.2)                  |
| Use more dietary exchanges      | 1213 | 0.44                            | 9.8 (0.4)                  | 9.9 (0.2)                    | 9.5 (0.3)                      | 9.5 (0.2)                    | 9.6 (0.2)                  |
| Keep track of fat grams         | 1182 | 0.06                            | 9.4 (0.3)                  | 9.5 (0.2)                    | 9.0 (0.2)                      | 9.6 (0.2)                    | 9.6 (0.2)                  |
| Limit sweets                    | 1344 | 0.30                            | 9.3 (0.2)                  | 9.5 (0.2)                    | 9.5 (0.2)                      | 9.4 (0.2)                    | 9.8 (0.3)                  |
| Limit high fat foods            | 1228 | 0.20                            | 9.0 (0.2)                  | 9.4 (0.2)                    | 9.3 (0.2)                      | 9.4 (0.2)                    | 9.5 (0.2)                  |
| Drink more milk                 | 1206 | 0.05                            | 9.6 (0.2)                  | 9.7 (0.2)                    | 9.5 (0.2)                      | 9.5 (0.2)                    | 9.2 (0.2)                  |
| Eat more fruits and vegetables  | 1320 | 0.72                            | 9.4 (0.2)                  | 9.5 (0.2)                    | 9.6 (0.2)                      | 9.5 (0.2)                    | 9.7 (0.3)                  |
| Eat more fiber and whole grains | 1271 | 0.08                            | 9.2 (0.2)                  | 9.6 (0.2)                    | 9.4 (0.2)                      | 9.6 (0.2)                    | 9.6 (0.2)                  |
| <b>Type 2 diabetes</b>          |      |                                 |                            |                              |                                |                              |                            |
| Keep track of calories          | 208  | 0.24                            | 7.5 (0.8)                  | 9.0 (0.6)                    | 8.6 (0.7)                      | 8.8 (0.6)                    | 9.0 (0.5)                  |
| Count carbohydrates             | 206  | 0.05                            | 8.2 (0.5)                  | 7.6 (0.6)                    | 9.1 (0.5)                      | 8.9 (0.6)                    | 9.3 (0.5)                  |
| Choose low glycemic index foods | 198  | 0.57                            | 8.0 (0.9)                  | 8.5 (0.6)                    | 9.3 (0.7)                      | 8.9 (0.6)                    | 9.0 (0.5)                  |
| Use more dietary exchanges      | 194  | 0.44                            | 9.4 (1.0)                  | 9.3 (0.7)                    | 8.4 (0.7)                      | 8.5 (0.6)                    | 9.3 (0.4)                  |
| Keep track of fat grams         | 199  | 0.69                            | 8.5 (0.9)                  | 8.6 (0.6)                    | 9.0 (0.6)                      | 8.8 (0.6)                    | 9.3 (0.5)                  |
| Limit sweets                    | 207  | 0.27                            | 8.3 (0.4)                  | 8.4 (0.7)                    | 8.9 (0.4)                      | 8.6 (0.8)                    | 10.3 (1.1)                 |
| Limit high fat foods            | 196  | 0.003                           | 7.5 (0.5)                  | 7.9 (0.7)                    | 8.8 (0.4)                      | 9.5 (0.6)                    | 9.7 (0.6)                  |
| Drink more milk                 | 194  | 0.57                            | 8.5 (0.7)                  | 9.3 (0.6)                    | 8.5 (0.6)                      | 8.4 (0.6)                    | 8.3 (0.5)                  |
| Eat more fruits and vegetables  | 210  | 0.47                            | 8.6 (0.4)                  | 8.5 (0.7)                    | 8.4 (0.4)                      | 8.6 (0.7)                    | 10.9 (1.3)                 |
| Eat more fiber and whole grains | 206  | 0.81                            | 8.4 (0.5)                  | 8.2 (0.7)                    | 8.4 (0.4)                      | 9.0 (0.5)                    | 8.8 (0.7)                  |

\*Models adjusted for: age at diagnosis, gender, race/ethnicity, baseline parental education, current insurance status, duration of DM, diabetes medication (T1: Pump Y/N, T2: Pump, other insulin, non-insulin only, none), and recommendation of relevant MNT item ever/never/DK (excluded if >90% recommendation rate: carbohydrates, limit sweets, fruits for both T1 and T2, fat foods and fiber for T2), as † p-value testing the overall effect of MNT use category

**Supplemental Figure S1. Self-reported use of dietary strategies at first visit (5.8y diabetes duration) and last visit (11.2y diabetes duration) in Type 1 diabetes**

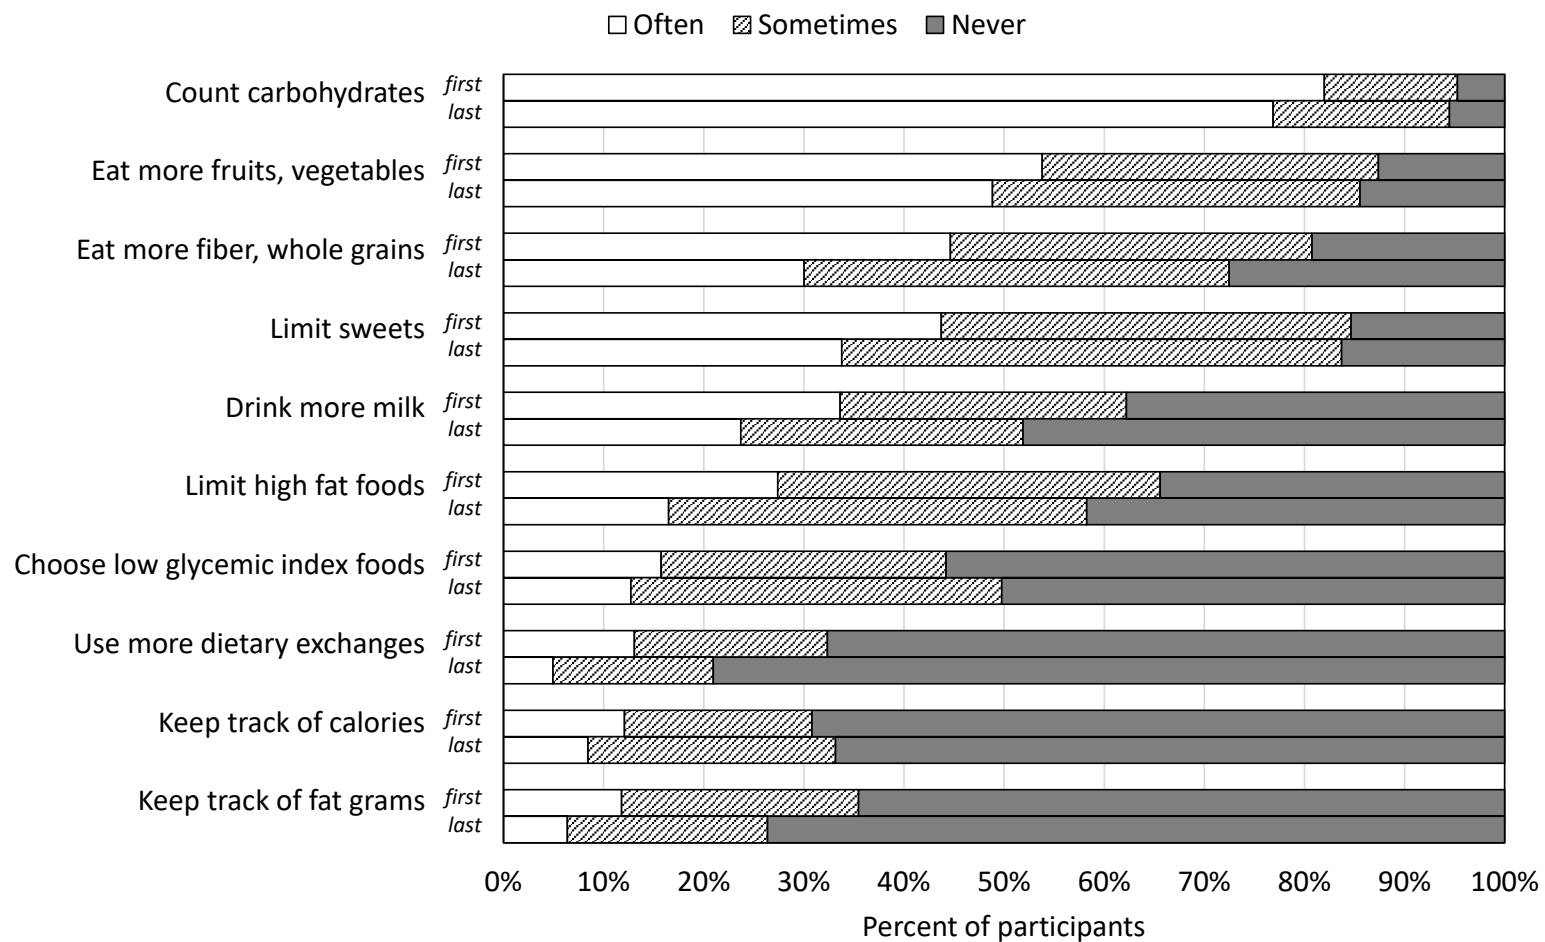

**Supplemental Figure S2. Self-reported use of dietary strategies at first visit (6.2y diabetes duration) and last visit (12.1y diabetes duration) in Type 2 diabetes**

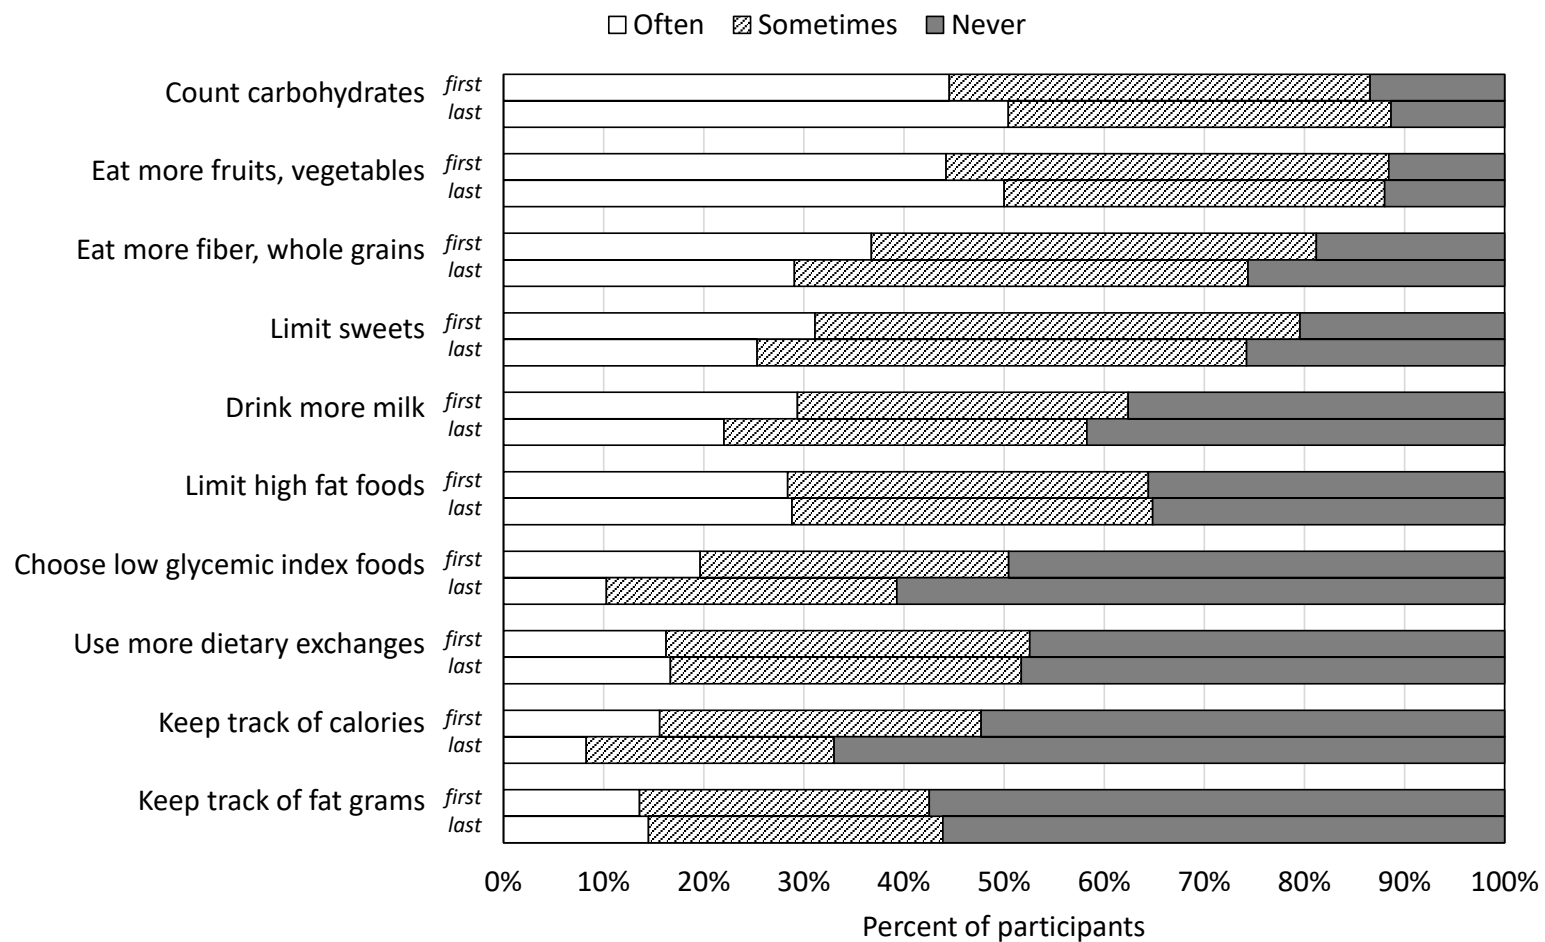

Supplement: NIHMS1617405-supplement-Supplementary_Material.pdf [file NIHMS1617405-supplement-Supplementary_Material.pdf]
